# Supplementary material for: A Humoral Immune Response Alters the Distribution of Enzyme Replacement Therapy in Murine Mucopolysaccharidosis Type I
Source: PubMed Central journal article supplement — Mol Ther Methods Clin Dev. 2017 Oct 5;8:42–51. doi: 10.1016/j.omtm.2017.09.008 (PMC5684429; doi:10.1016/j.omtm.2017.09.008), 2017-10-05
Supplement: mmc1.pdf [file mmc1.pdf]

**OMTM, Volume 8**

**Supplemental Information**

**A Humoral Immune Response Alters the  
Distribution of Enzyme Replacement Therapy  
in Murine Mucopolysaccharidosis Type I**

**Steven Q. Le, Shih-hsin Kan, Don Clarke, Valentina Sanghez, Martin Egeland, Kristen N. Vondrak, Terence M. Doherty, Moin U. Vera, Michelina Iacovino, Jonathan D. Cooper, Mark S. Sands, and Patricia I. Dickson**

## Supplemental information

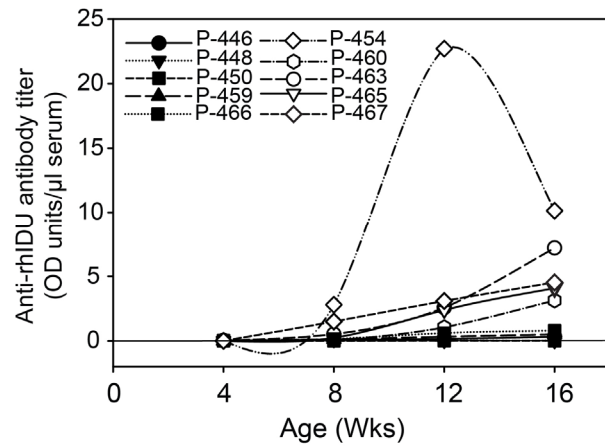

**Figure S1. Serum anti-rhIDU IgG antibody titers in MPS I mice.** MPS I mice were treated with 1.57 mg/kg weekly intravenous rhIDU and assayed at 4-week intervals as described in the materials and methods. Symbols indicate individual mice. Closed symbols: antibody-negative mice. Open symbols: antibody-positive mice.

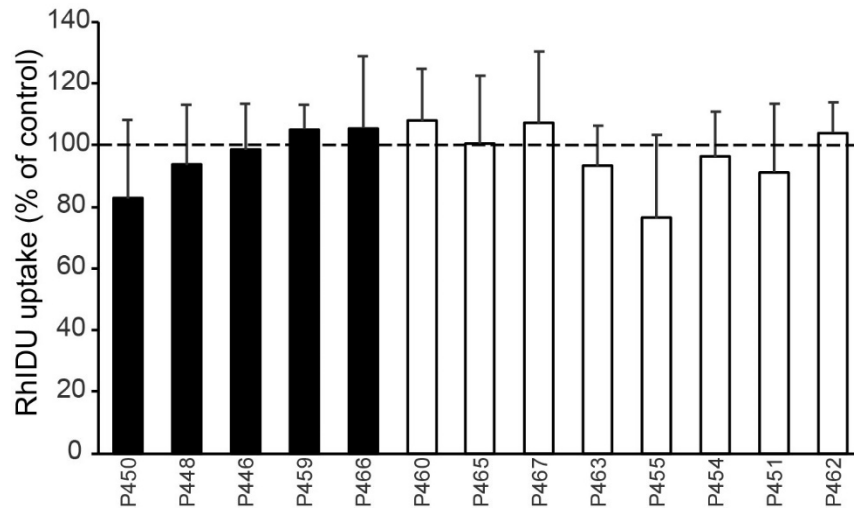

**Figure S2. Inhibition of rhIDU uptake by anti-rhIDU antibodies.** The uptake of rhIDU into MPS I human fibroblasts was measured in the presence of serum from antibody-negative mice (black bars) and antibody-positive mice (open bars). Values are expressed as a percentage of the uptake of rhIDU into human MPS I fibroblasts in the presence of pooled serum from naive, untreated MPS I (n = 5) and control (n = 5) mice (dashed line). Error bars represent standard deviation.

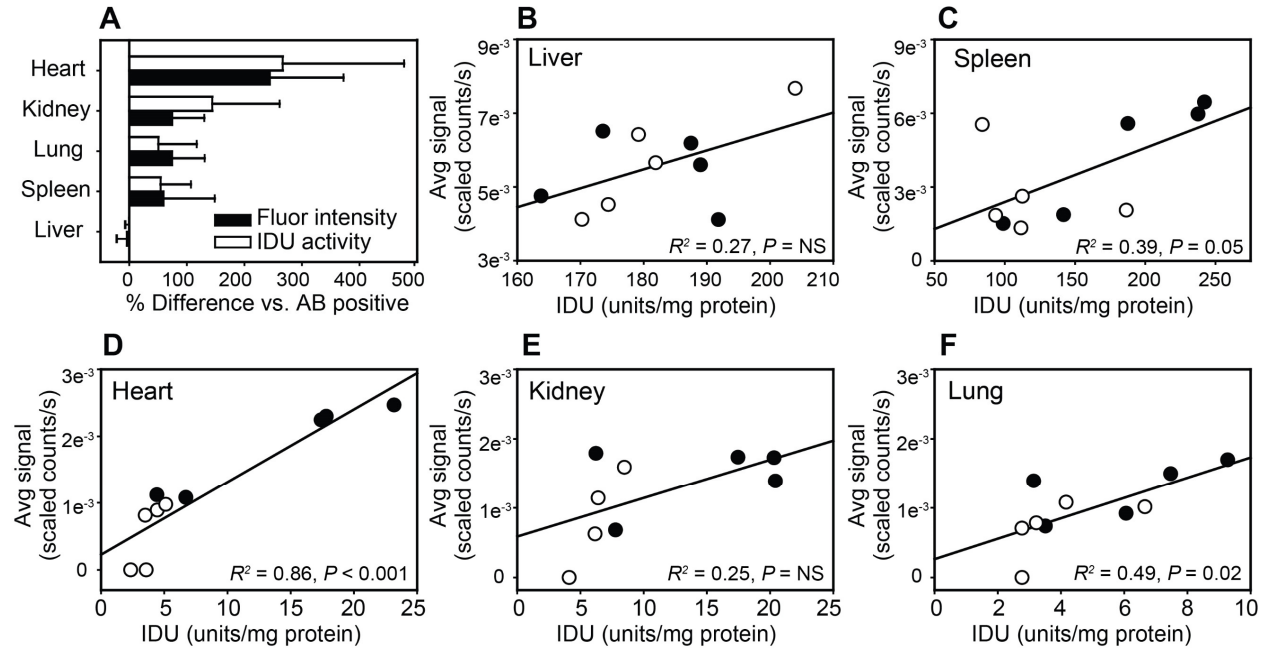

**Figure S3. Distribution of fluorescently-labeled rhIDU using fluorescence intensity compared to enzymatic activity assay.** (A) Bar graphs of whole-organ fluorescence intensity (“Fluor intensity,” black bars) and iduronidase activity (“IDU activity,” open bars) in antibody-negative mice. Values are expressed as the percent difference in group means compared to antibody-positive (“AB positive”) mice. Error bars represent standard deviation. (B-F) Scatterplots and linear regression of fluorescence intensity versus iduronidase activity. Filled symbols: antibody-negative mice. Open circles: antibody-positive mice.



**A**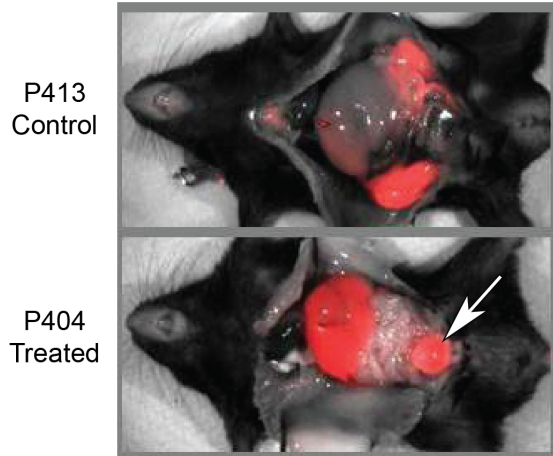**B**

| Iduronidase Activity in Urine |          |       |          |
|-------------------------------|----------|-------|----------|
|                               | Genotype | ID    | Units/ml |
| Untreated                     | MPS I    | P-442 | 0        |
| Tx at Wk16                    | MPS I    | P-428 | 0        |
|                               | MPS I    | P-437 | 0        |
| Tx at Wk4-16                  | MPS I    | P-446 | 0        |
|                               | MPS I    | P-448 | 0        |
|                               | MPS I    | P-454 | 0        |
|                               | MPS I    | P-463 | 0        |
|                               | MPS I    | P-465 | 0        |
|                               | MPS I    | P-466 | 0        |

**Figure S4. Excretion of free AF680 fluorescent label in urine.** (A) False-color image of fluorescence in organs of control mouse (top) and mouse treated with intravenous fluorescent-labeled rhIDU (bottom). Arrow: bladder. (B) Table showing lack of iduronidase activity in urine of treated mice.

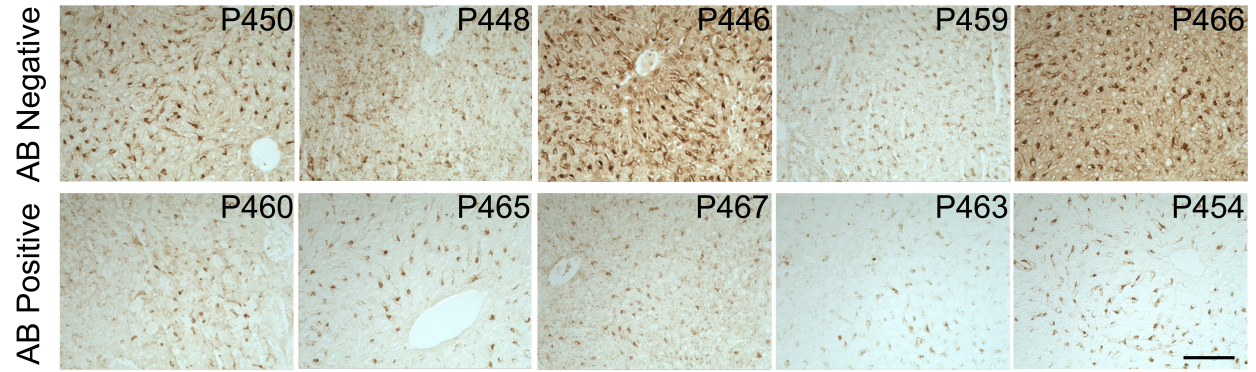

**Figure S5. Anti-rhIDU staining in liver of rhIDU-treated MPS I mice.** Immunohistochemistry was performed with EXPOSE IHC detection kit (Abcam, Cambridge, MA) on 10  $\mu\text{m}$ -thick organ sections with antibody against rhIDU (BP13, donated by BioMarin Pharmaceutical Inc. and used at 1:2000 dilution). Top row: antibody-negative treated MPS I mice (“AB Negative”). Bottom row: antibody-positive treated MPS I mice (“AB Positive”). 20x magnification. Scale bar 100  $\mu\text{m}$ .
